# Supplementary material
Source: Springer Nature journal article supplement (https://www.springermedizin.de/resource/supplementary/13058_2011_2856_MOESM5_ESM.pdf/9702728)

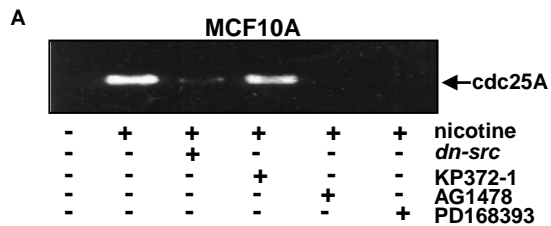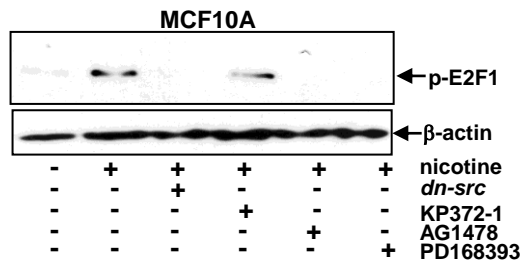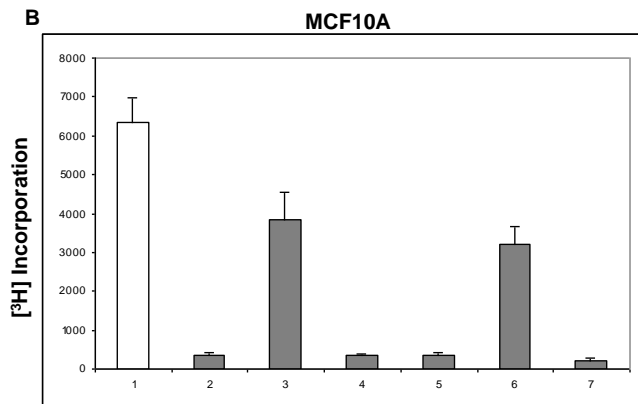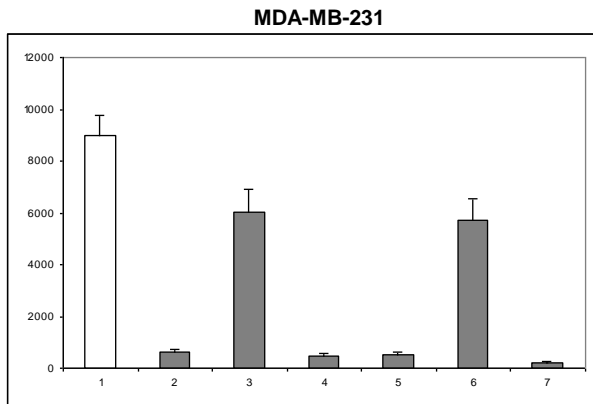

1. control
2. 0.5% serum
3. 0.5% serum+nicotine
4. 0.5% serum+nicotine+AG1478
5. 0.5% serum+nicotine+PD168393
6. 0.5% serum+nicotine+KP372-1
7. 0.5% serum+nicotine+KP372-1+PD168393

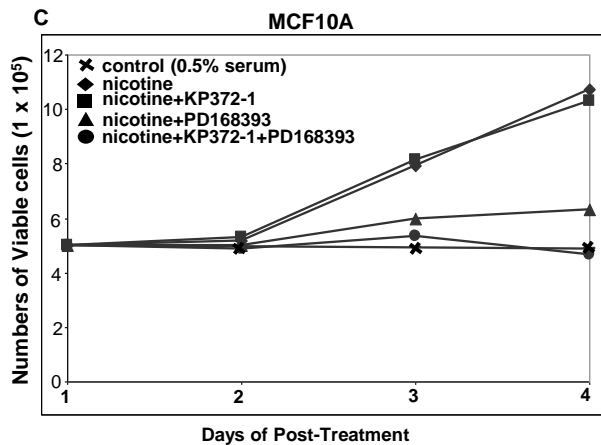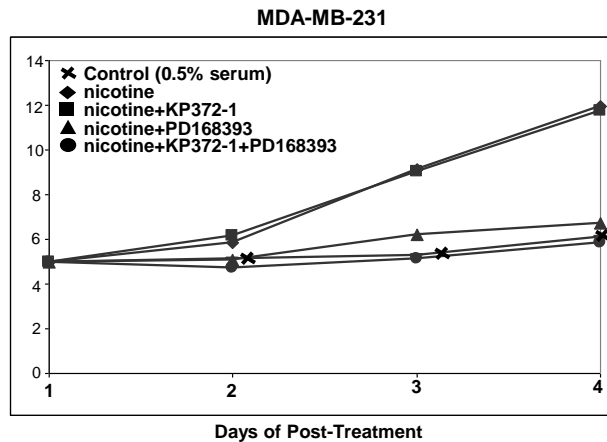

Supplement: MOESM5 [file 9702728]
